# Supplementary material for: Cannabigerolic acid, a major biosynthetic precursor molecule in cannabis, exhibits divergent effects on seizures in mouse models of epilepsy
Source: PubMed Central journal article supplement — Br J Pharmacol. 2021 Sep 30;178(24):4826–41. doi: 10.1111/bph.15661 (PMC9292928; doi:10.1111/bph.15661), 2021-09-30
Supplement: BPH-178-4826-s001.pdf [file BPH-178-4826-s001.pdf]

## Supporting Information for

### **Cannabigerolic acid, a major biosynthetic precursor molecule in cannabis, exhibits divergent effects on seizures in mouse models of epilepsy**

L.L. Anderson, M. Heblinski, N. L. Absalom, N.A. Hawkins, M. Bowen, M.J. Benson, F. Zhang, D. Bahceci, P.T. Doohan, M. Chebib, I.S. McGregor, J.A. Kearney and J.C. Arnold

\*Corresponding author. Email: [jonathon.arnold@sydney.edu.au](mailto:jonathon.arnold@sydney.edu.au)

#### **This PDF file includes:**

Supporting Figures 1 - 5  
Supporting Tables 1 - 4

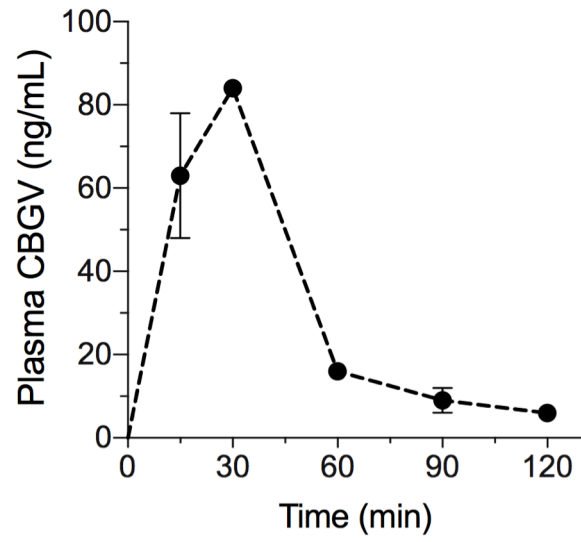

**Supporting Figure 1. Pharmacokinetic analysis of CBGV.** Concentration-time curve for CBGV in mouse plasma following a 1 mg/kg i.p. injection. Data are expressed as means  $\pm$  SEM, with n = 4-5 per time point.

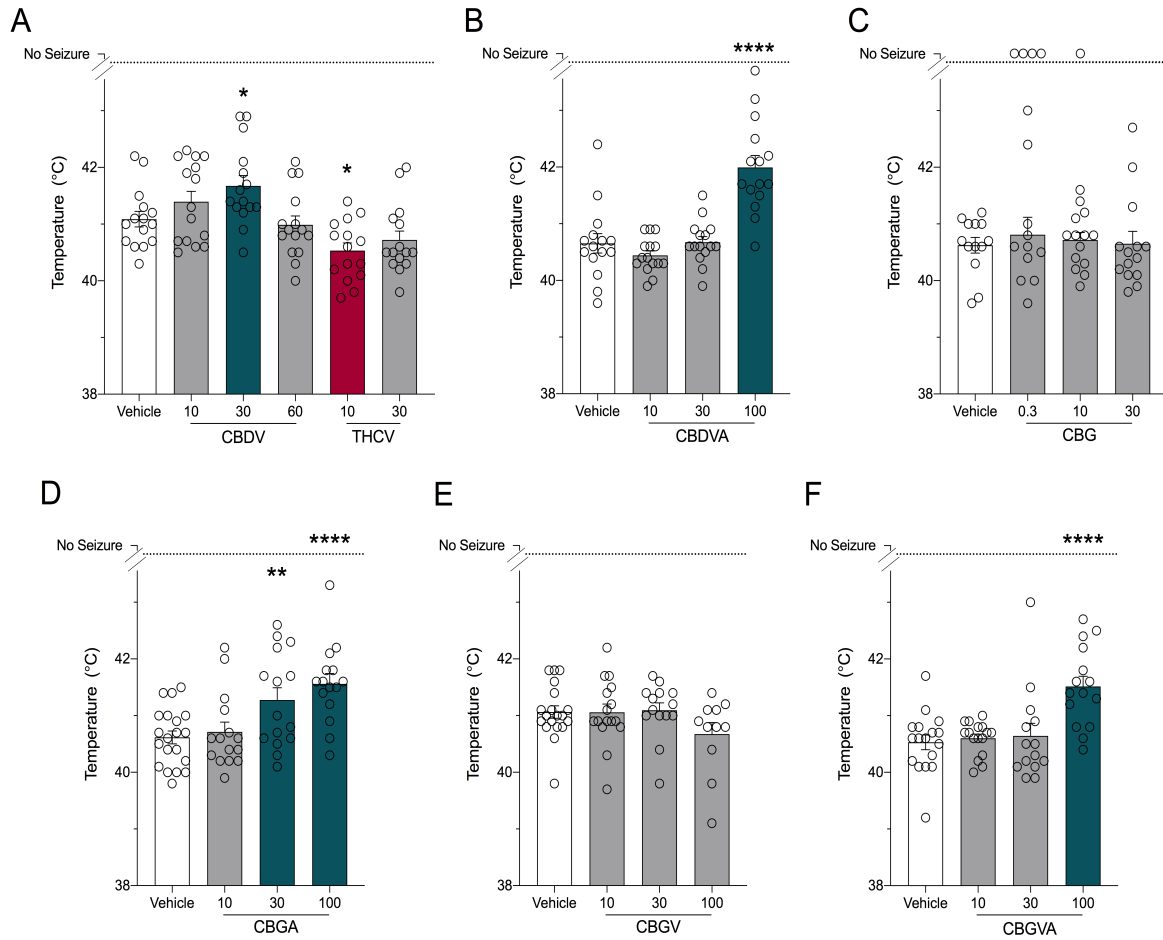

**Supporting Figure 2. Hyperthermia-induced seizure screen.** Temperature threshold for GTCS in individual mice treated acutely with (A) CBDV or THCV, (B) CBDVA, (C) CBG, (D) CBGA, (E) CBGV or (F) CBGVA. CBDV (30 mg/kg), CBDVA (100 mg/kg), CBGA (30 and 100 mg/kg) and CBGVA (100 mg/kg) treatments were anticonvulsant resulting in a significantly improved response to thermal seizure induction (blue-green bars); whereas, THCV (3 mg/kg) was proconvulsant and significantly lowered the thermal threshold (red bar). Error bars represent SEM, with  $n = 12-20$  per group ( $*p < 0.05$ ,  $**p < 0.01$ ,  $****p < 0.0001$ ; logrank Mantel-Cox).

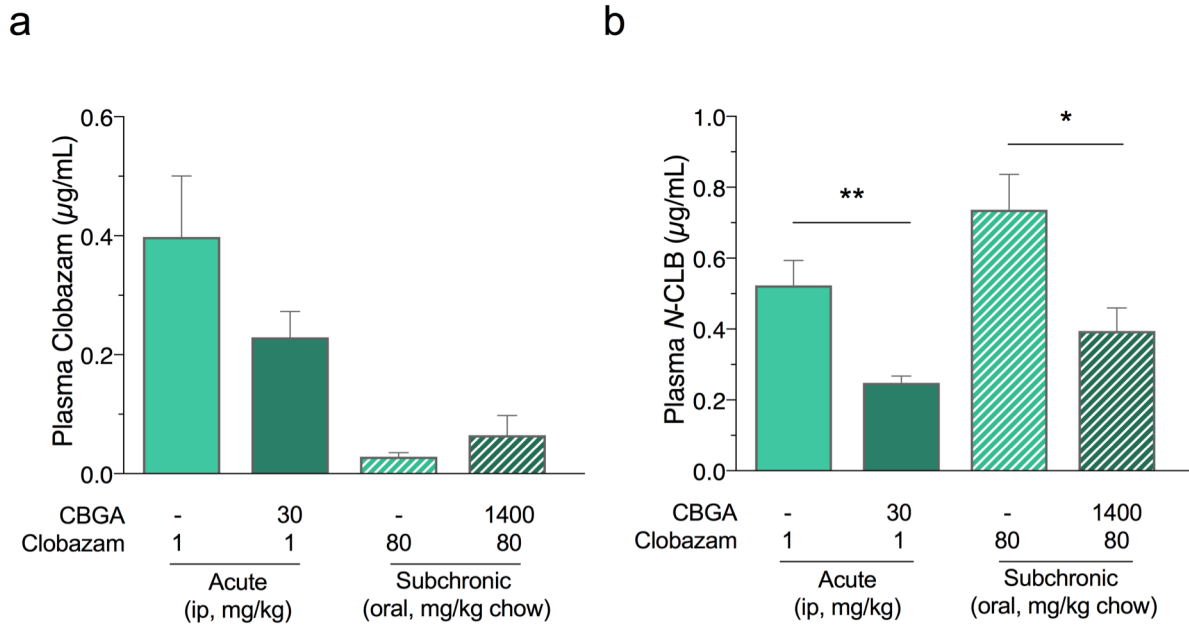

**Supporting Figure 3. Pharmacokinetic interaction between CBGA and N-CLB, the active metabolite of clobazam.** Average plasma concentrations of (a) clobazam and (b) N-CLB in *Scn1a*<sup>+/-</sup> mice from hyperthermia-induced seizure and spontaneous seizure experiments. Clobazam was administered acutely (solid bars) or subchronically (hatched bars) in the presence (dark green bars) and absence of CBGA (light green bars), with n = 5 per treatment. Significantly lower plasma N-CLB levels were observed following combination treatment of CBGA and clobazam (\* $p < 0.05$ , \*\* $p < 0.01$ ; Student's t-test).

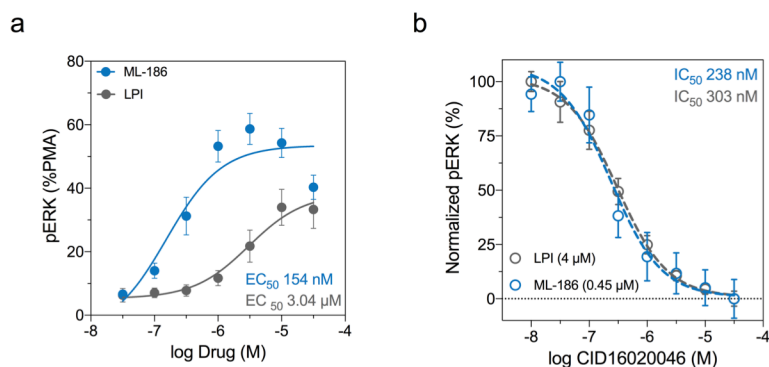

**Supporting Figure 4. *In vitro* characterization of GPR55 activity.** HEK293 cells expressing human GPR55 were used to characterize inhibitory and agonist activity of compounds. ERK phosphorylation (pERK) was used as a measure of GPR55 activation. **(a)** Concentration-response curves for activation of GPR55 by ML-186 (blue symbols) and LPI (gray symbols). Data are expressed as mean  $\pm$  SEM normalized to 100 nM phorbol 12-myristate 13-acetate (PMA) and fit to the Hill equation, with  $n = 3-4$  per concentration. **(b)** Concentration-response for CID16020046 inhibition of GPR55 activation measured by ERK phosphorylation (pERK). GPR55 activation was measured following treatment with either LPI (gray symbols) or ML-186 (blue symbols) in the presence of varying concentrations of CID16020046 and expressed as a percentage of responses to ligand alone. Data are expressed as mean  $\pm$  SEM, with  $n = 6$  per group. Curves represent fit to a three-parameter log function and  $IC_{50}$  values are listed.

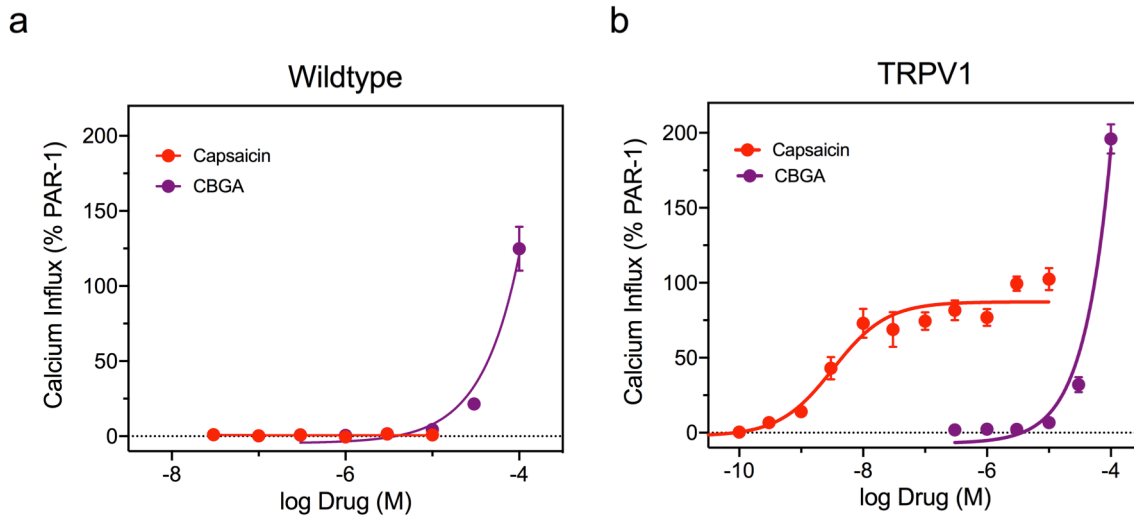

**Supporting Figure 5. *In vitro* characterization of TRPV1 agonists.** HEK293 cells expressing human TRPV1 were used to characterize agonist activity of capsaicin and CBGA. Changes in intracellular calcium were used as a measure of TRPV1 activation. Concentration-response curves for capsaicin (red) and CBGA (purple) in (a) wildtype and (b) TRPV1-expressing cells. Data are expressed as mean  $\pm$  SEM normalized to PAR-1 and fit to the Hill equation, with  $n = 4-5$  per group. The  $EC_{50}$  value of capsaicin for TRPV1 was 3.3 nM (95% Confidence Interval, 1.9 - 5.8 nM). Non-specific calcium influx was observed with CBGA treatment (30 and 100  $\mu$ M).

---

**Supporting Table 1. Parameters for LC-MS/MS Detection of Phytocannabinoids**

---

| <b>Compound</b> | <b>Molecular weight</b> | <b>Parent &gt; daughter ions (m/z)</b> |
|-----------------|-------------------------|----------------------------------------|
| CBDV            | 286.4                   | 287.30 > 165.25<br>287.30 > 123.20     |
| CBDVA           | 330.4                   | 331.10 > 191.05<br>331.10 > 233.15     |
| CBG             | 316.5                   | 317.25 > 193.10<br>317.25 > 123.25     |
| CBGV            | 288.4                   | 289.00 > 165.10                        |
| CBGVA           | 332.4.                  | 333.10 > 315.20                        |
| CBGA            | 360.5                   | 361.20 > 343.10<br>361.20 > 219.10     |
| THCV            | 286.4                   | 287.30 > 165.20<br>287.30 > 135.25     |

---

---

**Supporting Table 2. Eurofins DiscoverX GPCR Screen**

---

| <b>GPCR</b>  | <b>Ligand</b>                         |
|--------------|---------------------------------------|
| ADCYAP1R1    | PACAP-27                              |
| ADORA3       | 2-CI-IB-MECA                          |
| ADRA1B       | Phenylephrine                         |
| ADRA2A       | UK 14,304                             |
| ADRA2B       | UK 14,304                             |
| ADRA2C       | UK 14,304                             |
| ADRB1        | Isoproterenol                         |
| ADRB2        | Isoproterenol                         |
| AGTR1        | Angiotensin II                        |
| AGTRL1       | Apelin-13                             |
| AVPR1A       | Vasopressin                           |
| AVPR1B       | Vasopressin                           |
| AVPR2        | Vasopressin                           |
| BDKRB1       | LDA-Bradykinin                        |
| BDKRB2       | Bradykinin                            |
| BRS3         | TAPN-Bombesin                         |
| C3AR1        | C3A Receptor Agonist (Short Fragment) |
| C5AR1        | Complement C5a                        |
| C5L2         | Complement C5a                        |
| CALCR        | Calcitonin                            |
| CALCRL-RAMP1 | beta CGRP                             |
| CALCRL-RAMP2 | Adrenomedullin                        |
| CALCRL-RAMP3 | Adrenomedullin                        |
| CALCR-RAMP2  | Calcitonin                            |
| CALCR-RAMP3  | Calcitonin                            |
| CCKAR        | CCK-8                                 |
| CCKBR        | CCK-8                                 |
| CCR10        | CCL27                                 |
| CCR1         | CCL3                                  |
| CCR2         | CCL2                                  |
| CCR3         | CCL13                                 |
| CCR4         | CCL22                                 |
| CCR5         | CCL3                                  |
| CCR6         | CCL20                                 |
| CCR7         | CCL19                                 |
| CCR8         | CCL1                                  |
| CCR9         | CCL25                                 |
| CHRM1        | Acetylcholine                         |
| CHRM2        | Acetylcholine                         |
| CHRM3        | Acetylcholine                         |
| CHRM4        | Acetylcholine                         |
| CHRM5        | Acetylcholine                         |
| CMKLR1       | Chemerin                              |
| CNR1         | CP55940                               |
| CNR2         | CP55940                               |
| CRHR1        | Sauvagine                             |
| CRHR2        | Sauvagine                             |
| CRTH2        | PGD2                                  |
| CX3CR1       | Fractalkine                           |
| CXCR1        | CXCL8                                 |
| CXCR2        | CXCL8                                 |



|         |                            |
|---------|----------------------------|
| CXCR3   | CXCL11                     |
| CXCR4   | CXCL12                     |
| CXCR5   | CXCL13                     |
| CXCR6   | CXCL16                     |
| CXCR7   | CXCL12                     |
| DRD1    | Dopamine                   |
| DRD2L   | Dopamine                   |
| DRD2S   | Dopamine                   |
| DRD3    | Dopamine                   |
| DRD4    | Dopamine                   |
| DRD5    | Dopamine                   |
| EBI2    | 7a,25-Dihydroxycholesterol |
| EDG1    | S-1-P                      |
| EDG3    | S-1-P                      |
| EDG4    | Oleoyl LPA                 |
| EDG5    | S-1-P                      |
| EDG6    | S-1-P                      |
| EDG7    | Oleoyl LPA                 |
| EDNRA   | Endothelin I               |
| EDNRB   | Endothelin 3               |
| F2R     | TFLLR-NH2                  |
| F2RL1   | SLIGRL-NH2                 |
| F2RL3   | AYPGKF-NH2                 |
| FFAR1   | GW9508                     |
| FPR1    | WKYMVm-NH2                 |
| FPRL1   | WKYMVm-NH2                 |
| FSHR    | FSH                        |
| GALR1   | Galanin                    |
| GALR2   | Galanin                    |
| GCGR    | Glucagon                   |
| GHSR    | Ghrelin                    |
| GIPR    | GIP                        |
| GLP1R   | Exendin-4                  |
| GLP2R   | GLP II (1-33)              |
| GPR1    | Chemerin                   |
| GPR103  | QRFP-26                    |
| GPR109A | Nicotinic Acid             |
| GPR109B | 3-Hydroxyoctanoic Acid     |
| GPR119  | Oleoyl Ethanolamide        |
| GPR120  | GW9508                     |
| GPR35   | Zaprinast                  |
| GPR92   | Oleoyl LPA                 |
| GRPR    | GRP                        |
| HCRTR1  | Orexin A                   |
| HCRTR2  | Orexin A                   |
| HRH1    | Histamine                  |
| HRH2    | Histamine                  |
| HRH3    | R-a methylhistamine        |
| HRH4    | Histamine                  |
| HTR1A   | Serotonin                  |
| HTR1B   | Serotonin                  |
| HTR1E   | Serotonin                  |
| HTR1F   | Serotonin                  |
| HTR2A   | Serotonin                  |

|         |                        |
|---------|------------------------|
| HTR2C   | Serotonin              |
| HTR5A   | Serotonin              |
| KISS1R  | Kisspeptin-10          |
| LHCGR   | hCG                    |
| LTB4R   | Leukotriene B4         |
| MC1R    | Melanotan II           |
| MC3R    | Melanotan II           |
| MC4R    | Melanotan II           |
| MC5R    | Melanotan II           |
| MCHR1   | MCH                    |
| MCHR2   | MCH                    |
| MLNR    | Motilin                |
| MRGPRX1 | BAM(8-22)              |
| MRGPRX2 | Cortistatin 14         |
| MTNR1A  | 2-Iodomelatonin        |
| NMBR    | Neuromedin B           |
| NMU1R   | Neuromedin U-25        |
| NPBWR1  | Neuropeptide W23       |
| NPBWR2  | Neuropeptide W23       |
| NPFFR1  | RFRP-3                 |
| NPSR1b  | Neuropeptide S         |
| NPY1R   | Peptide YY             |
| NPY2R   | Peptide YY             |
| NTSR1   | [Lys 8,9] Neurotensin  |
| OPRD1   | DADLE                  |
| OPRK1   | Dynorphin A            |
| OPRL1   | Orphanin FQ            |
| OPRM1   | [Met] Enkephalin       |
| OXER1   | 5-OxoETE               |
| OXR     | Oxytocin               |
| P2RY1   | 2-methylthio-ADP       |
| P2RY11  | ATP                    |
| P2RY12  | 2-methylthio-ADP       |
| P2RY2   | UTP                    |
| P2RY4   | UTP                    |
| P2RY6   | UTP                    |
| PPYR1   | Pancreatic Polypeptide |
| PRLHR   | PrRP-31                |
| PROKR1  | EG VEGF                |
| PROKR2  | EG VEGF                |
| PTAFR   | PAF                    |
| PTGER2  | Prostaglandin E2       |
| PTGER3  | Prostaglandin E2       |
| PTGER4  | Prostaglandin E2       |
| PTGFR   | Cloprostenol           |
| PTGIR   | Beraprost              |
| PTHR1   | PTH(1-34)              |
| PTHR2   | TIP-39                 |
| RXFP3   | Relaxin-3              |
| SCTR    | Secretin               |
| SSTR1   | Somatostatin 28        |
| SSTR2   | Somatostatin 28        |
| SSTR3   | Tyr-SST 14             |
| SSTR5   | Somatostatin 28        |

|         |                              |
|---------|------------------------------|
| TACR1   | Substance P                  |
| TACR2   | Substance P                  |
| TACR3   | Substance P                  |
| TBXA2R  | I-BOP                        |
| TRHR    | TRH                          |
| TSHR(L) | TSH                          |
| UTR2    | Urotensin II                 |
| VIPR1   | VIP                          |
| VIPR2   | VIP                          |
| BAI1    | PathHunter Detection Reagent |
| BAI2    | PathHunter Detection Reagent |
| BAI3    | PathHunter Detection Reagent |
| CCRL2   | PathHunter Detection Reagent |
| DARC    | PathHunter Detection Reagent |
| GHSR1B  | Flash Detection Reagent      |
| GPR101  | Flash Detection Reagent      |
| GPR107  | PathHunter Detection Reagent |
| GPR12   | Flash Detection Reagent      |
| GPR123  | PathHunter Detection Reagent |
| GPR132  | PathHunter Detection Reagent |
| GPR135  | PathHunter Detection Reagent |
| GPR137  | PathHunter Detection Reagent |
| GPR139  | PathHunter Detection Reagent |
| GPR141  | PathHunter Detection Reagent |
| GPR142  | Flash Detection Reagent      |
| GPR143  | PathHunter Detection Reagent |
| GPR146  | PathHunter Detection Reagent |
| GPR148  | Flash Detection Reagent      |
| GPR149  | PathHunter Detection Reagent |
| GPR15   | PathHunter Detection Reagent |
| GPR150  | Flash Detection Reagent      |
| GPR151  | PathHunter Detection Reagent |
| GPR152  | PathHunter Detection Reagent |
| GPR157  | PathHunter Detection Reagent |
| GPR161  | PathHunter Detection Reagent |
| GPR162  | PathHunter Detection Reagent |
| GPR17   | PathHunter Detection Reagent |
| GPR171  | Flash Detection Reagent      |
| GPR173  | PathHunter Detection Reagent |
| GPR176  | PathHunter Detection Reagent |
| GPR18   | Flash Detection Reagent      |
| GPR182  | PathHunter Detection Reagent |
| GPR20   | PathHunter Detection Reagent |
| GPR23   | PathHunter Detection Reagent |
| GPR25   | Flash Detection Reagent      |
| GPR26   | Flash Detection Reagent      |
| GPR27   | PathHunter Detection Reagent |
| GPR3    | PathHunter Detection Reagent |
| GPR30   | Flash Detection Reagent      |
| GPR31   | PathHunter Detection Reagent |
| GPR32   | PathHunter Detection Reagent |
| GPR37   | PathHunter Detection Reagent |
| GPR37L1 | PathHunter Detection Reagent |
| GPR39   | PathHunter Detection Reagent |

|         |                              |
|---------|------------------------------|
| GPR4    | Flash Detection Reagent      |
| GPR45   | PathHunter Detection Reagent |
| GPR50   | PathHunter Detection Reagent |
| GPR52   | Flash Detection Reagent      |
| GPR55   | PathHunter Detection Reagent |
| GPR6    | PathHunter Detection Reagent |
| GPR61   | PathHunter Detection Reagent |
| GPR65   | PathHunter Detection Reagent |
| GPR75   | PathHunter Detection Reagent |
| GPR78   | Flash Detection Reagent      |
| GPR79   | Flash Detection Reagent      |
| GPR83   | PathHunter Detection Reagent |
| GPR84   | PathHunter Detection Reagent |
| GPR85   | Flash Detection Reagent      |
| GPR88   | PathHunter Detection Reagent |
| GPR22   | PathHunter Detection Reagent |
| GPR97   | PathHunter Detection Reagent |
| LGR4    | PathHunter Detection Reagent |
| LGR5    | Flash Detection Reagent      |
| LGR6    | PathHunter Detection Reagent |
| MRGPRD  | PathHunter Detection Reagent |
| MRGPRE  | PathHunter Detection Reagent |
| MRGPRF  | PathHunter Detection Reagent |
| MRGPRX4 | PathHunter Detection Reagent |
| OPN5    | Flash Detection Reagent      |
| OXGR1   | PathHunter Detection Reagent |
| P2RY8   | PathHunter Detection Reagent |
| TAAR5   | Flash Detection Reagent      |

---

**Supporting Table 3. Plasma cannabinoid concentrations in experimental *Scn1a*<sup>+/-</sup> mice**

| Cannabinoid | Dose (mg/kg) | Plasma Concentration ( $\mu\text{g/mL}$ ) |
|-------------|--------------|-------------------------------------------|
| CBDV        | 10           | 562 $\pm$ 70 ng/mL                        |
|             | 30           | 3.1 $\pm$ 0.3                             |
|             | 60           | 4.0 $\pm$ 0.6                             |
| CBDVA       | 10           | 9 $\pm$ 2                                 |
|             | 30           | 45 $\pm$ 6                                |
|             | 100          | 79 $\pm$ 10                               |
| CBG         | 0.3          | 2 $\pm$ 0 ng/mL                           |
|             | 10           | 92 $\pm$ 11 ng/mL                         |
|             | 30           | 1.1 $\pm$ 0.1                             |
| CBGV        | 10           | 807 $\pm$ 182 ng/mL                       |
|             | 30           | 1.5 $\pm$ 0.4                             |
|             | 100          | 7 $\pm$ 1                                 |
| CBGVA       | 10           | 106 $\pm$ 16                              |
|             | 30           | 181 $\pm$ 18                              |
|             | 100          | 400 $\pm$ 23                              |
| CBGA        | 10           | 13 $\pm$ 1                                |
|             | 30           | 43 $\pm$ 3                                |
|             | 100          | 73 $\pm$ 10                               |
| THCV        | 3            | 81 $\pm$ 18 ng/mL                         |
|             | 10           | 352 $\pm$ 28 ng/mL                        |

---

**Supporting Table 4. Effect on GPR55 activity**

---

|                          | <b>Treatment</b> | <b>EC<sub>50</sub> (nM)</b> | <b>pEC<sub>50</sub> ± SEM</b> | <b>E<sub>max</sub> ± SEM (%)</b> |
|--------------------------|------------------|-----------------------------|-------------------------------|----------------------------------|
| <b>CBGA<br/>(ML-186)</b> | Vehicle          | 266                         | 6.57 ± 0.19                   | 105 ± 9                          |
|                          | 1 μM             | 680                         | 6.16 ± 0.20                   | 81 ± 8                           |
|                          | 3 μM             | 323                         | 6.49 ± 0.29                   | 66 ± 9*                          |
|                          | 10 μM            | 478                         | 6.32 ± 0.55                   | 5 ± 5**                          |

---

Substrate listed in parantheses

EC<sub>50</sub>, concentration of substrate at 50% maximal activity

E<sub>max</sub>, maximal activity relative to 10 μM substrate (%)

\**p* < 0.05, \*\**p* < 0.01 compared to vehicle; Extra sum-of-squares F test
